# Supplementary material for: Regeneration of Cu/SAPO-34(MO) with H2O only: too good to be true?
Source: Royal Society of Chemistry journal article supplement (doi:10.1039/c9cy01981b), 2020-01-01
Supplement: c9cy01981b1.pdf [file c9cy01981b1.pdf]

## Supplementary Information

### Regeneration of Cu/SAPO-34(MO) with H<sub>2</sub>O only: Too good to be true?

Jungwon Woo<sup>a\*</sup>, Diana Bernin<sup>a</sup>, Homayoun Ahari<sup>b</sup>, Mark Shost<sup>b</sup>, Michael Zammit<sup>b</sup> and Louise Olsson<sup>a\*</sup>

<sup>a</sup>Chemical Engineering, Competence Centre for Catalysis, Chalmers University of Technology, SE-412 96

Gothenburg, Sweden

<sup>b</sup>FCA US LLC, 800 Chrysler Drive, Auburn Hills, MI 48326-2766, USA

\*[jungwon@chalmers.se](mailto:jungwon@chalmers.se); [louise.olsson@chalmers.se](mailto:louise.olsson@chalmers.se)

#### Figures

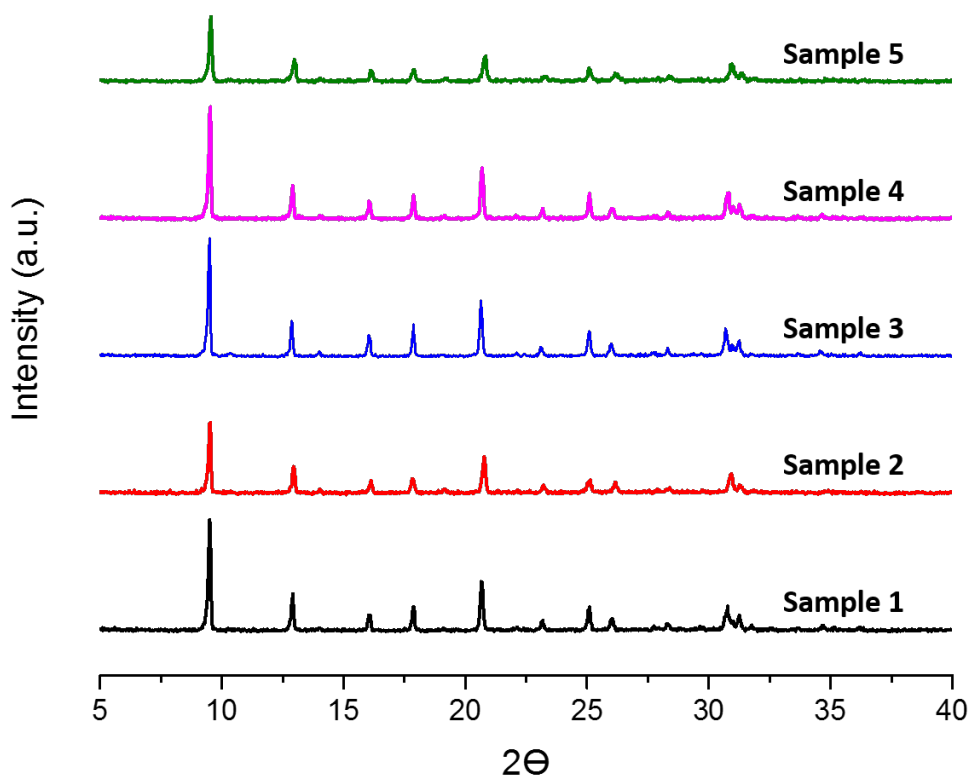

**Figure S1.** XRD patterns of Cu/SAPO-34(MO) after reaction experiments WEE-1, 2, 3, 4 (See Tables S1-4 for experimental conditions). Sample 5 is de-greened only.

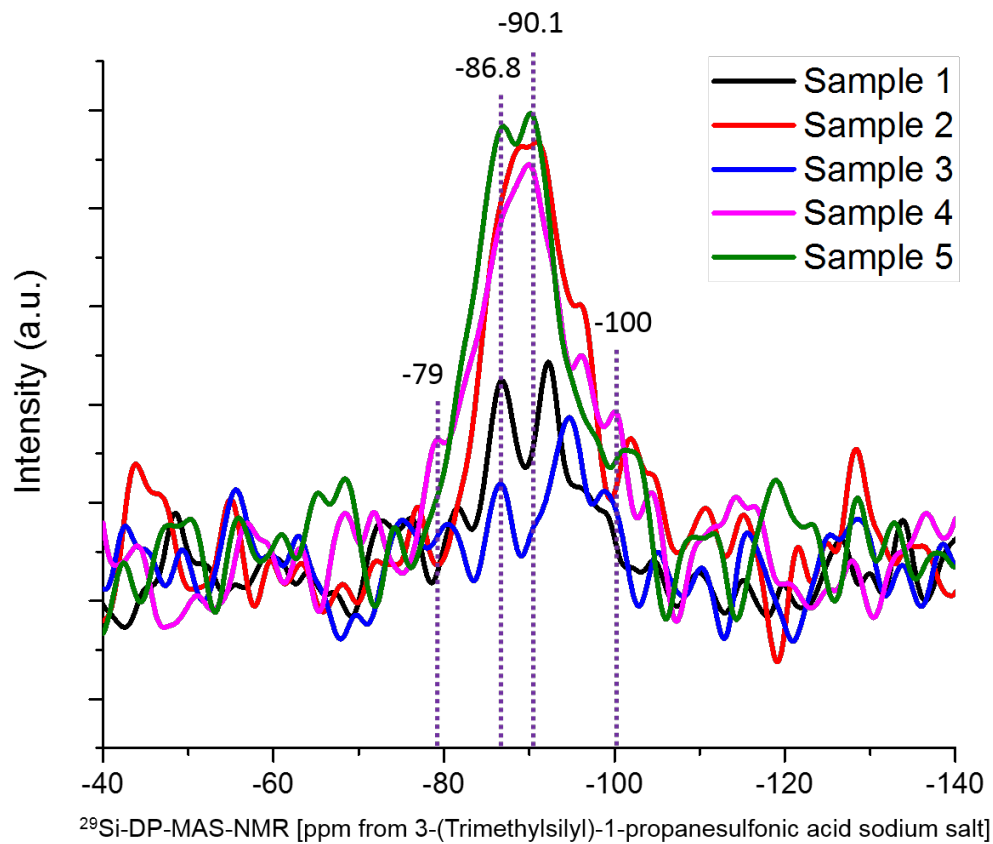

**Figure S2.**  $^{29}\text{Si}$  CP MAS NMR spectra of Cu/SAPO-34(MO) after reaction experiments WEE-1, 2, 3, 4 (See Tables S1-4 for experimental conditions.) Sample 5 is de-greened only.

## Tables

**Table S1.** Series of steps in water exposure experiment 1 (WEE-1): pre-treatment conditions and reaction temperatures for NH<sub>3</sub>-SCR.

| Series of experimental plans | Water exposure test (WT)                                    | Temperature protocol (°C) |
|------------------------------|-------------------------------------------------------------|---------------------------|
| WEE1-Step 1 (S-1)            | 8% O <sub>2</sub> , 7.5% H <sub>2</sub> O at 70 °C for 5 hr | 150, 200, 250             |
| WEE1-Step 2 (S-2)            | 8% O <sub>2</sub> , 7.5% H <sub>2</sub> O at 70 °C for 5 hr | 150, 200, 250             |
| WEE1-Step 3 (S-3)            | 8% O <sub>2</sub> , 7.5% H <sub>2</sub> O at 70 °C for 5 hr | 150, 200, 250             |
| WEE1-Step 4 (S-4)            | 8% O <sub>2</sub> , 10% H <sub>2</sub> O at 70 °C for 5 hr  | 150, 200, 250             |
| WEE1-Step 5 (S-5)            | 8% O <sub>2</sub> , 10% H <sub>2</sub> O at 70 °C for 5 hr  | 150, 200, 250             |
| WEE1-Step 6 (S-6)            | 8% O <sub>2</sub> , 10% H <sub>2</sub> O at 70 °C for 5 hr  | 150, 200, 250             |

**Table S2.** Series of steps in water exposure experiment 2 (WEE-2): pre-treatment conditions and reaction temperatures for NH<sub>3</sub>-SCR.

| Series of experimental plans | Water exposure test                                         | Temperature protocol (°C) |
|------------------------------|-------------------------------------------------------------|---------------------------|
| WEE2-Step 1 (S-1)            | 8% O <sub>2</sub> , 7.5% H <sub>2</sub> O at 70 °C for 5 hr | 150, 200, 250             |
| WEE2-Step 2 (S-2)            | 8% O <sub>2</sub> , 7.5% H <sub>2</sub> O at 70 °C for 5 hr | 150, 200, 250             |
| WEE2-Step 3 (S-3)            | 8% O <sub>2</sub> , 7.5% H <sub>2</sub> O at 70 °C for 5 hr | 150, 200, 250             |
| WEE2-Step 4 (S-4)            | 8% O <sub>2</sub> , 7.5% H <sub>2</sub> O at 70 °C for 5 hr | 150, 200, 250             |
| WEE2-Step 5 (S-5)            | 8% O <sub>2</sub> , 7.5% H <sub>2</sub> O at 70 °C for 5 hr | 150, 200, 250             |
| WEE2-Step 6 (S-6)            | 8% O <sub>2</sub> , 7.5% H <sub>2</sub> O at 70 °C for 5 hr | 150, 200, 250             |
| WEE2-Step 7 (S-7)            | 8% O <sub>2</sub> , 10% H <sub>2</sub> O at 70 °C for 5 hr  | 150, 200, 250             |
| WEE2-Step 8 (S-8)            | 8% O <sub>2</sub> , 10% H <sub>2</sub> O at 70 °C for 5 hr  | 150, 200, 250             |
| WEE2-Step 9 (S-9)            | 8% O <sub>2</sub> , 10% H <sub>2</sub> O at 70 °C for 5 hr  | 150, 200, 250             |

**Table S3.** Series of steps in water exposure experiment 3 (WEE-3): pre-treatment conditions and reaction temperatures for NH<sub>3</sub>-SCR.

| Series of experimental plans | Water exposure test                                        | Temperature protocol (°C) |
|------------------------------|------------------------------------------------------------|---------------------------|
| WEE3-Step 1 (S-1)            | 8% O <sub>2</sub> , 10% H <sub>2</sub> O at 70 °C for 5 hr | 150, 200, 250             |
| WEE3-Step 2 (S-2)            | 8% O <sub>2</sub> , 10% H <sub>2</sub> O at 70 °C for 5 hr | 150, 200, 250             |
| WEE3-Step 3 (S-3)            | 8% O <sub>2</sub> , 10% H <sub>2</sub> O at 70 °C for 5 hr | 150, 200, 250             |
| WEE3-Step 4 (S-4)            | 8% O <sub>2</sub> , 10% H <sub>2</sub> O at 70 °C for 5 hr | 150, 200, 250             |
| WEE3-Step 5 (S-5)            | 8% O <sub>2</sub> , 10% H <sub>2</sub> O at 70 °C for 5 hr | 150, 200, 250             |
| WEE3-Step 6 (S-6)            | 8% O <sub>2</sub> , 10% H <sub>2</sub> O at 70 °C for 5 hr | 150, 200, 250             |
| WEE3-Step 7 (S-7)            | 8% O <sub>2</sub> , 10% H <sub>2</sub> O at 70 °C for 5 hr | 150, 200, 250             |
| WEE3-Step 8 (S-8)            | 8% O <sub>2</sub> , 10% H <sub>2</sub> O at 70 °C for 5 hr | 150, 200, 250             |
| WEE3-Step 9 (S-9)            | 8% O <sub>2</sub> , 10% H <sub>2</sub> O at 70 °C for 5 hr | 150, 200, 250             |
| WEE3-Step 23 (S-23)          | 8% O <sub>2</sub> , 10% H <sub>2</sub> O at 70 °C for 5 hr | 150, 200, 250             |

**Table S4.** Series of steps in water exposure experiment 4 (WEE-4): pre-treatment conditions and reaction temperatures for NH<sub>3</sub>-SCR.

| Series of experimental plans | Water exposure test                                          | Temperature protocol (°C) |
|------------------------------|--------------------------------------------------------------|---------------------------|
| WEE4-Step 1 (S-1)            | 8% O <sub>2</sub> , 5% H <sub>2</sub> O at 70 °C for 5 hr    | 150, 200, 250             |
| WEE4-Step 2 (S-2)            | 8% O <sub>2</sub> , 5% H <sub>2</sub> O at 70 °C for 5 hr    | 150, 200, 250             |
| WEE4-Step 3 (S-3)            | 8% O <sub>2</sub> , 5% H <sub>2</sub> O at 70 °C for 5 hr    | 150, 200, 250             |
| WEE4-Step 4 (S-4)            | 8% O <sub>2</sub> , 5% H <sub>2</sub> O at 70 °C for 5 hr    | 150, 200, 250             |
| WEE4-Step 5 (S-5)            | 8% O <sub>2</sub> , 5% H <sub>2</sub> O at 70 °C for 5 hr    | 150, 200, 250             |
| WEE4-Step 6 (S-6)            | 8% O <sub>2</sub> , 10% H <sub>2</sub> O at 70 °C for 5 hr   | 150, 200, 250             |
| WEE4-Step 7 (S-7)            | 8% O <sub>2</sub> , 10% H <sub>2</sub> O at 70 °C for 5 hr   | 150, 200, 250             |
| WEE4-Step 8 (S-8)            | 8% O <sub>2</sub> , 10% H <sub>2</sub> O at 70 °C for 5 hr   | 150, 200, 250             |
| WEE4-Step 9 (S-9)            | 8% O <sub>2</sub> , 7.5% H <sub>2</sub> O at 70 °C for 5 hr  | 150, 200, 250             |
| WEE4-Step 10 (S-10)          | 8% O <sub>2</sub> , 7.5% H <sub>2</sub> O at 70 °C for 5 hr  | 150, 200, 250             |
| WEE4-Step 11 (S-11)          | 8% O <sub>2</sub> , 7.5% H <sub>2</sub> O at 70 °C for 5 hr  | 150, 200, 250             |
| WEE4-Step 12 (S-12)          | 8% O <sub>2</sub> , 12.5% H <sub>2</sub> O at 70 °C for 5 hr | 150, 200, 250             |
| WEE4-Step 13 (S-13)          | 8% O <sub>2</sub> , 12.5% H <sub>2</sub> O at 70 °C for 5 hr | 150, 200, 250             |
| WEE4-Step 14 (S-14)          | 8% O <sub>2</sub> , 12.5% H <sub>2</sub> O at 70 °C for 5 hr | 150, 200, 251             |
| WEE4-Step 15 (S-15)          | 8% O <sub>2</sub> , 12.5% H <sub>2</sub> O at 70 °C for 5 hr | 150, 200, 252             |
| WEE4-Step 16 (S-16)          | 8% O <sub>2</sub> , 12.5% H <sub>2</sub> O at 70 °C for 5 hr | 150, 200, 253             |

**Table S5.** In-situ H<sub>2</sub>-TPR with consecutive H<sub>2</sub>O exposure using the same monolith.

| Series of experimental plans | Conditions                                                                            | Temperature protocol (°C) |
|------------------------------|---------------------------------------------------------------------------------------|---------------------------|
| Degreening                   | 400 ppm NH <sub>3</sub> , 400 ppm NO, 8% O <sub>2</sub> , 5% H <sub>2</sub> O for 4 h | 750                       |
| H <sub>2</sub> -TPR-1        | H <sub>2</sub> (2000 ppm) with Ar                                                     | 70-750                    |
| NH <sub>3</sub> -SCR-1       | 400 ppm NH <sub>3</sub> , 400 ppm NO, 8% O <sub>2</sub> , 5% H <sub>2</sub> O         | 150, 200, 250             |
| H <sub>2</sub> O exposure-1  | 5 % H <sub>2</sub> O and 8% O <sub>2</sub> for 5 h                                    | 70                        |
| H <sub>2</sub> -TPR-2        | H <sub>2</sub> (2000 ppm) with Ar                                                     | 70-750                    |
| NH <sub>3</sub> -SCR-2       | 400 ppm NH <sub>3</sub> , 400 ppm NO, 8% O <sub>2</sub> , 5% H <sub>2</sub> O         | 150, 200, 250             |
| H <sub>2</sub> O exposure-2  | 7.5 % H <sub>2</sub> O and 8% O <sub>2</sub> for 5 h                                  | 70                        |
| H <sub>2</sub> -TPR-3        | H <sub>2</sub> (2000 ppm) with Ar                                                     | 70-750                    |
| NH <sub>3</sub> -SCR-3       | 400 ppm NH <sub>3</sub> , 400 ppm NO, 8% O <sub>2</sub> , 5% H <sub>2</sub> O         | 150, 200, 250             |
| H <sub>2</sub> O exposure-3  | 10 % H <sub>2</sub> O and 8% O <sub>2</sub> for 5 h                                   | 70                        |
| H <sub>2</sub> -TPR-4        | H <sub>2</sub> (2000 ppm) with Ar                                                     | 70-750                    |
| NH <sub>3</sub> -SCR-4       | 400 ppm NH <sub>3</sub> , 400 ppm NO, 8% O <sub>2</sub> , 5% H <sub>2</sub> O         | 150, 200, 250             |

**Table S6.** BET and micropore surface area, pore volume, and average pore diameter of Cu/SAPO-34(MO) treated with WEE-1, 2, 3, and 4.

| Catalyst                      | S <sub>BET</sub> (m <sup>2</sup> /g) | Pore volume (cm <sup>3</sup> /g) | Average pore diameter (Å) |
|-------------------------------|--------------------------------------|----------------------------------|---------------------------|
| Sample 1 (Treated with WEE-1) | 591                                  | 0.32                             | 21.7                      |
| Sample 2 (Treated with WEE-2) | 522                                  | 0.26                             | 19.7                      |
| Sample 3 (Treated with WEE-3) | 529                                  | 0.27                             | 20.1                      |
| Sample 4 (Treated with WEE-4) | 605                                  | 0.30                             | 20.0                      |
| Sample 5 (Only degreened)     | 528                                  | 0.27                             | 20.7                      |

**Table S7.** Distribution (%) of Al environments obtained from deconvoluted <sup>27</sup>Al MAS NMR spectra of Cu/SAPO-34(MO) treated with WEE-1, 2, 3, and 4.

|          | Al(IV) | Al(V) | Al(VI) |
|----------|--------|-------|--------|
| Sample 1 | 61.9   | 12.5  | 25.7   |
| Sample 2 | 55.8   | 12.9  | 31.3   |
| Sample 3 | 63.8   | 14.1  | 22.1   |
| Sample 4 | 54.8   | 12.4  | 32.8   |
| Sample 5 | 53.9   | 12.1  | 33.9   |

### **Further information about 1-year old sample that underwent structural collapse**

We have earlier found (data not shown) that if Cu/SAPO-34(MO) is left in air for very long time the structure starts to collapse as evidenced by a significant drop in BET surface area. We therefore prepared a monolith using Cu/SAPO-34 that was left on the shelf for one year. We observed a significant drop in initial activity (after degreening) where the conversions at 150, 200, 250°C dropped to 4.8, 24.2, 40.4 %, respectively, from 24, 65, 75% in Figure 1. We confirmed the partial collapsed structure with XRD and BET (data not shown), where the BET decreased from 610m<sup>2</sup>/g to 89 m<sup>2</sup>/g, and this can explain the low activity of the 1-year old sample. We tried to also regenerate this sample using 10% H<sub>2</sub>O, which was not possible since the structure had collapsed. Thus, the focus of this work is the regeneration of Cu/SAPO-34, when the zeolite structure is still maintained.
